# Supplementary material for: Presence of Phthalate Esters Used as Common Plasticisers in Maltese Shoreline Sand
Source: Preprints.org preprint supplement (doi:10.20944/preprints202305.0948.v1), 2023-05-12
Supplement: Supplementary file 1 [file supplementary]

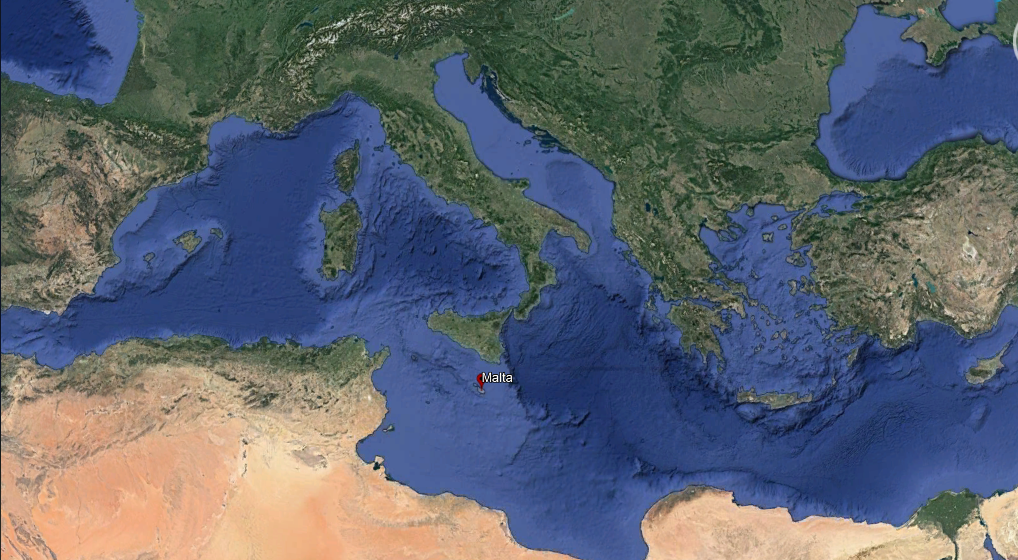


Figure S1. The geographical location of Malta in the centre of the Mediterranean.


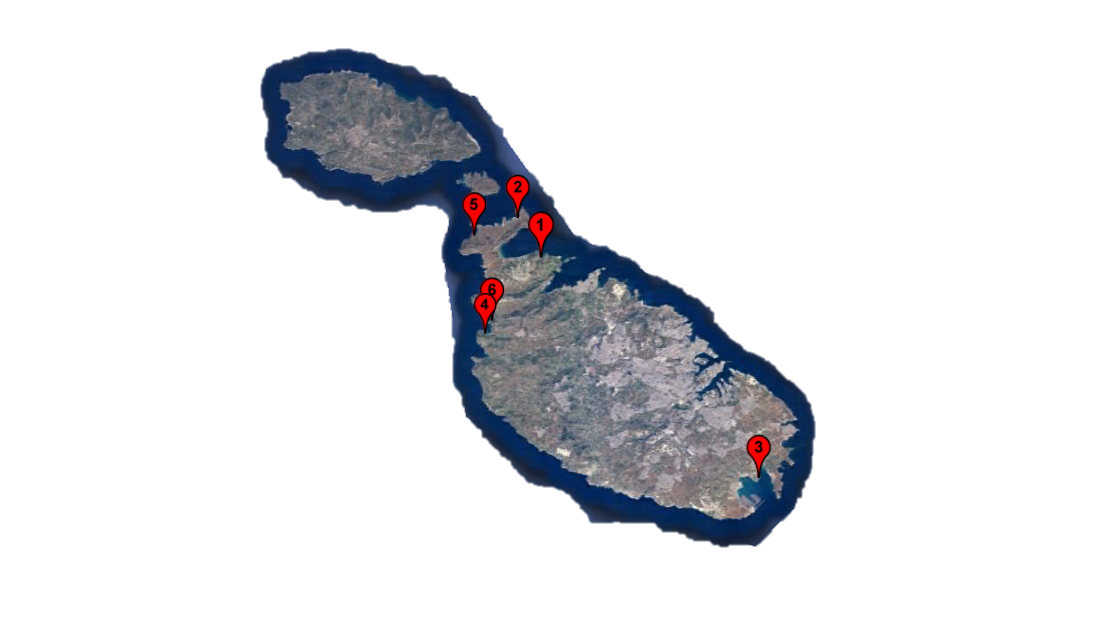

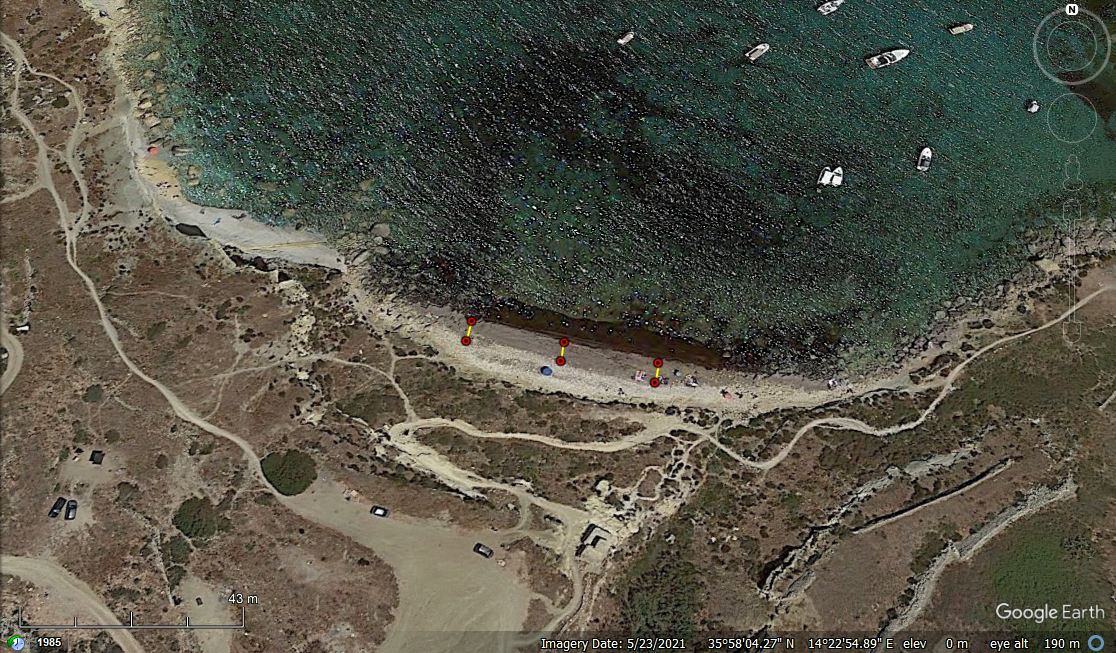

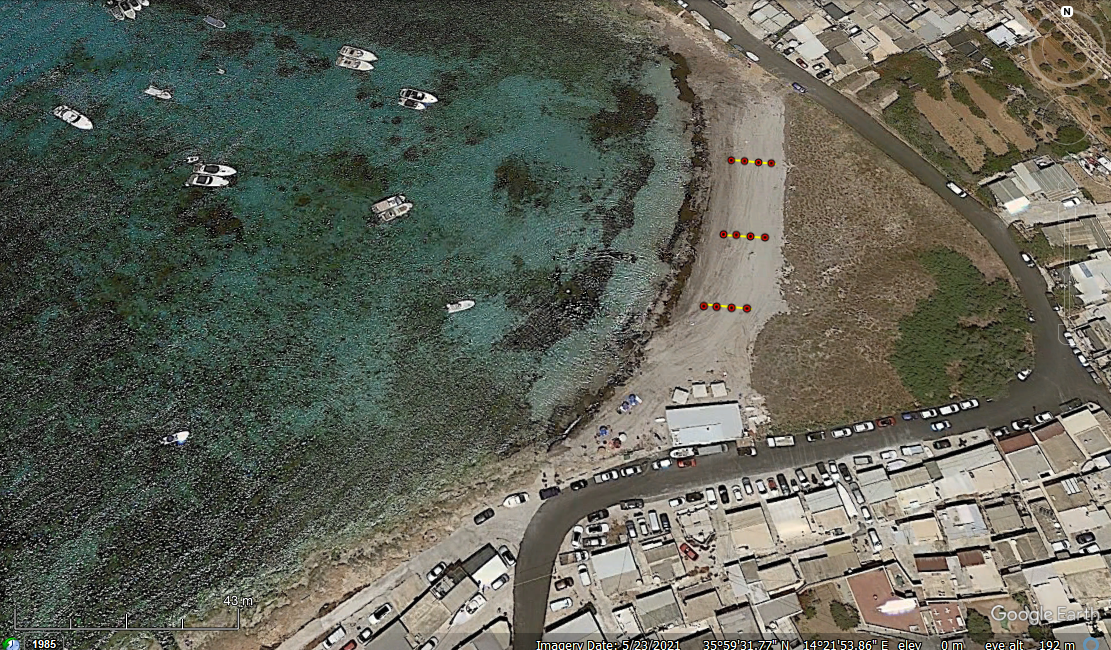

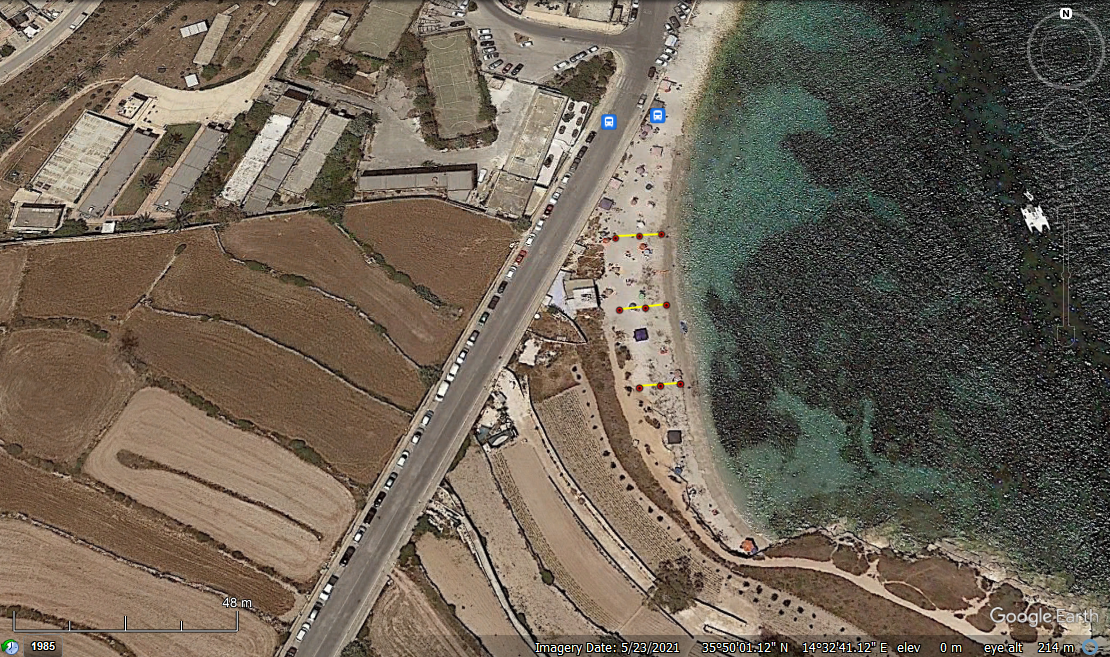

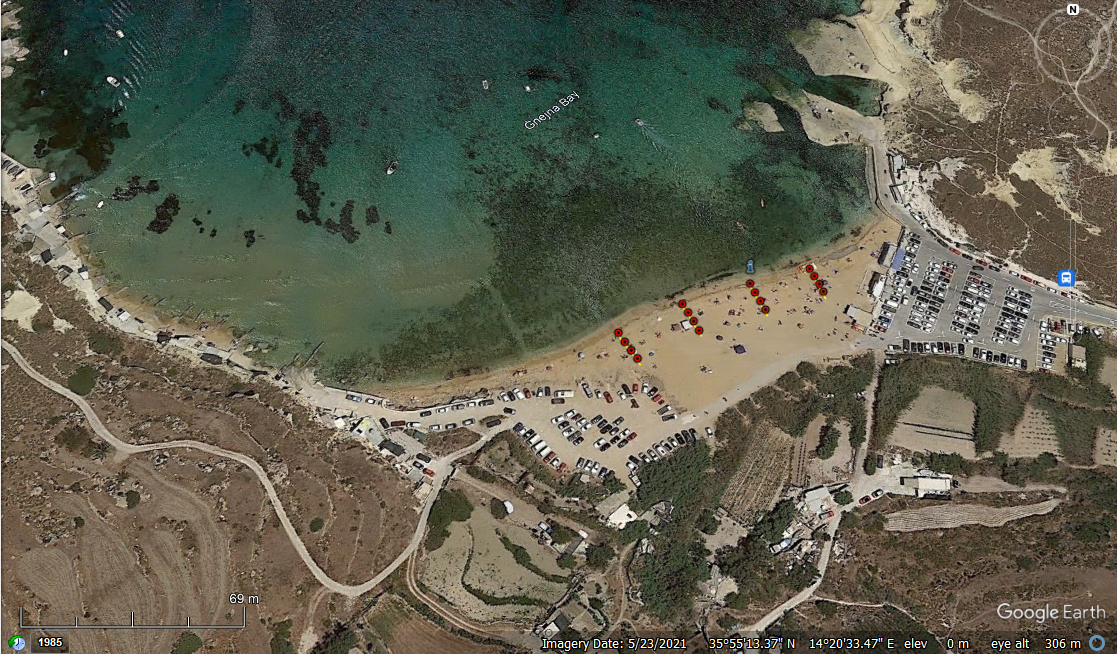

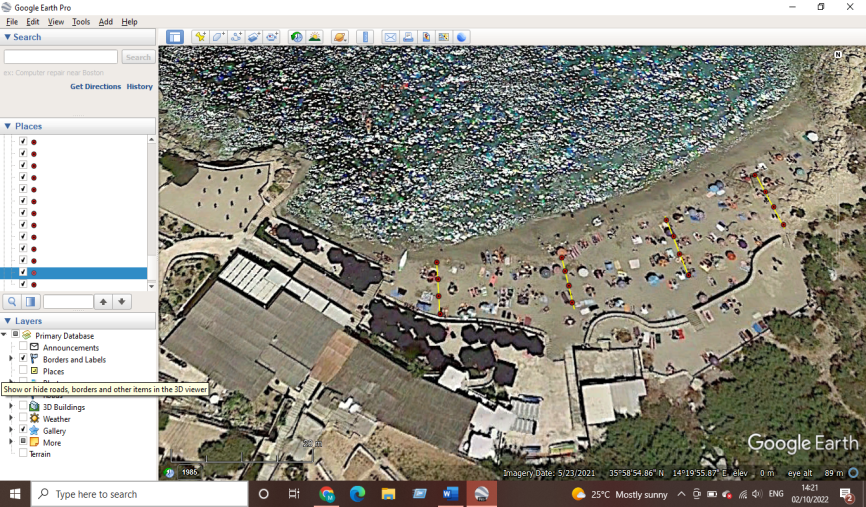

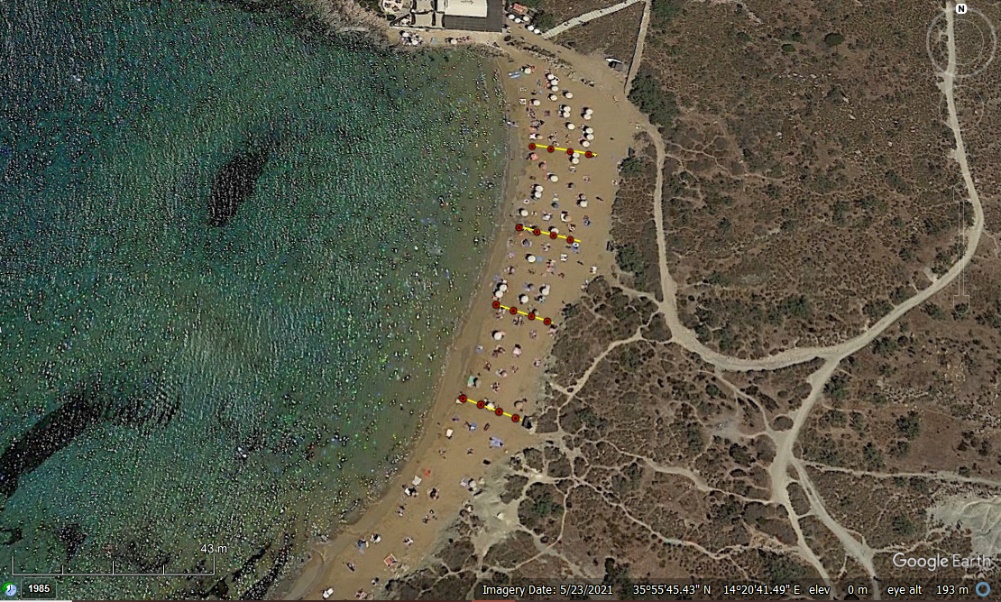


Figure S2. The location of the Maltese beaches sampled; (Key: 1-Imġiebaħ 2- White Tower, 3- Għar Aħmar, 4- Ġnejna, 5- Paradise Bay, 6- Riviera ; represents the quadrats; represents the sampling stations assembled)
